# Supplementary material for: Anthraquinone and its derivatives as sustainable materials for electrochemical applications – a joint experimental and theoretical investigation of the redox potential in solution
Source: Royal Society of Chemistry journal article supplement (doi:10.1039/d2cp01717b), 2022-01-01
Supplement: d2cp01717b1.pdf [file d2cp01717b1.pdf]

# Anthraquinone and its Derivatives as Sustainable Materials for Electrochemical Applications – a Joint Experimental and Theoretical Investigation of the Redox Potential in Solution

## Supplementary Material

*Josef M. Gallmetzer<sup>a</sup>, Stefanie Kröll<sup>a</sup>, Daniel Werner<sup>b</sup>, Dominik Wielend<sup>c</sup>,  
Mihai Irimia-Vladu<sup>c</sup>, Engelbert Portenkirchner<sup>b,\*b</sup>, Niyazi Serdar Sariciftci<sup>c</sup>,  
Thomas S. Hofer<sup>a,†</sup>*

<sup>a</sup>Theoretical Chemistry Division  
Institute of General, Inorganic and Theoretical Chemistry  
Center for Chemistry and Biomedicine  
University of Innsbruck, Innrain 80-82, A-6020 Innsbruck, Austria

<sup>b</sup>Institute of Physical Chemistry  
Josef-Möller-Haus  
University of Innsbruck, Innrain 52c, A-6020 Innsbruck, Austria

<sup>c</sup>Linz Institute for Organic Solar Cells (LIOS)  
Institute of Physical Chemistry  
Johannes Kepler University Linz, Altenberger Strasse 69,  
4040 Linz, Austria

June 20, 2022

---

\*Corresponding author (experimental): engelbert.portenkirchner@uibk.ac.at

†Corresponding author (theory): t.hofer@uibk.ac.at

Table S1: Experimentally determined reduction potentials.

| <b>Compound:</b>             | $\Delta E^\circ(\text{AQ}/\text{AQ}^{\bullet-}) / \text{mV}$ | $\Delta E^\circ(\text{AQ}/\text{AQ}^{2-}) / \text{mV}$ |
|------------------------------|--------------------------------------------------------------|--------------------------------------------------------|
| <b>AQ</b>                    | -683.6                                                       | -1432.3                                                |
| <b>1-OH</b>                  | -530.0                                                       | -1178.5                                                |
| <b>2-OH</b>                  | -707.5                                                       | -1139.8                                                |
| <b>1,2-OH</b>                | -542.9                                                       | -1125.5                                                |
| <b>1,4-OH</b>                | -423.9                                                       | -1066.4                                                |
| <b>1,5-OH</b>                | -369.1                                                       | -893.5                                                 |
| <b>1,8-OH</b>                | -396.4                                                       | -1107.0                                                |
| <b>1-NH<sub>2</sub></b>      | -816.4                                                       | -1516.9                                                |
| <b>2-NH<sub>2</sub></b>      | -875.9                                                       | -                                                      |
| <b>1,2-NH<sub>2</sub></b>    | -950.6                                                       | -1551.2                                                |
| <b>1,4-NH<sub>2</sub></b>    | -983.4                                                       | -1541.8                                                |
| <b>2,6-NH<sub>2</sub></b>    | -1086.0                                                      | -1652.3                                                |
| <b>1-NH<sub>2</sub>-4-OH</b> | -710.4                                                       | -1328.9                                                |

Table S2: Comparison of the electrochemical potential obtained for the first reduction step (AQ/AQ $\bullet^-$ ) at B3LYP+D3/SMD level against the experimental reference.

| <b>Compound</b>              | $\Delta E_{calc}^\circ$ / mV | $\Delta E_{meas}^\circ$ / mV | $\Delta\Delta E^\circ$ / mV |
|------------------------------|------------------------------|------------------------------|-----------------------------|
| <b>AQ*</b>                   | -683.6*                      | -683.6                       | 0.0                         |
| <b>1-OH</b>                  | -528.1                       | -530.0                       | -1.9                        |
| <b>2-OH</b>                  | -718.8                       | -707.5                       | 11.3                        |
| <b>1,2-OH</b>                | -554.3                       | -542.9                       | 11.4                        |
| <b>1,4-OH</b>                | -466.0                       | -423.9                       | 42.1                        |
| <b>1,5-OH</b>                | -387.9                       | -369.1                       | 18.8                        |
| <b>1,8-OH</b>                | -436.5                       | -396.4                       | 40.1                        |
| <b>1-NH<sub>2</sub></b>      | -796.4                       | -816.4                       | -20.0                       |
| <b>2-NH<sub>2</sub></b>      | -834.6                       | -875.9                       | -41.3                       |
| <b>1,2-NH<sub>2</sub></b>    | -945.0                       | -950.6                       | -5.6                        |
| <b>1,4-NH<sub>2</sub></b>    | -1010.4                      | -983.4                       | 26.9                        |
| <b>2,6-NH<sub>2</sub></b>    | -1006.3                      | -1086.0                      | -79.7                       |
| <b>1-OH-4-NH<sub>2</sub></b> | -728.8                       | -710.4                       | 18.4                        |

\*reference value

Table S3: Comparison of the electrochemical potential obtained for the second reduction step (AQ/AQ<sup>2-</sup>) at B3LYP+D3/SMD level against the experimental reference.

| Compound                     | $\Delta E_{calc}^{\circ}$ / mV | $\Delta E_{meas}^{\circ}$ / mV | $\Delta\Delta E^{\circ}$ / mV |
|------------------------------|--------------------------------|--------------------------------|-------------------------------|
| <b>AQ</b>                    | -1432.3*                       | -1432.3                        | 0.0                           |
| <b>1-OH</b>                  | -1196.9                        | -1178.5                        | 18.4                          |
| <b>2-OH</b>                  | -1474.4                        | -1139.8                        | <b>334.6</b>                  |
| <b>1,2-OH</b>                | -1177.9                        | -1125.5                        | 52.4                          |
| <b>1,4-OH</b>                | -1135.9                        | -1066.4                        | 69.5                          |
| <b>1,5-OH</b>                | -1032.8                        | -893.5                         | <b>139.3</b>                  |
| <b>1,8-OH</b>                | -1129.61                       | -1107.0                        | 22.6                          |
| <b>1-NH<sub>2</sub></b>      | -1494.4                        | -1516.9                        | -22.5                         |
| <b>1,2-NH<sub>2</sub></b>    | -1601.9                        | -1551.2                        | 50.8                          |
| <b>1,4-NH<sub>2</sub></b>    | -1616.2                        | -1541.8                        | 74.4                          |
| <b>2,6-NH<sub>2</sub></b>    | -1696.3                        | -1652.3                        | 44.0                          |
| <b>1-OH-4-NH<sub>2</sub></b> | -1369.2                        | -1328.9                        | 40.3                          |

\*reference value

Table S4: Comparison of the electrochemical potential obtained for the first reduction step (AQ/AQ $\bullet^-$ ) at SCC DFTB/3ob/COSMO level against the experimental reference.

| <b>Compound</b>              | $\Delta E_{calc}^{\circ}$ / mV | $\Delta E_{meas}^{\circ}$ / mV | $\Delta\Delta E^{\circ}$ / mV |
|------------------------------|--------------------------------|--------------------------------|-------------------------------|
| <b>AQ*</b>                   | -683.6*                        | -683.6                         | 0.0                           |
| <b>1-OH</b>                  | -524.1                         | -530.0                         | -5.9                          |
| <b>2-OH</b>                  | -746.7                         | -707.5                         | 39.2                          |
| <b>1,2-OH</b>                | -605.0                         | -542.9                         | 62.1                          |
| <b>1,4-OH</b>                | -415.5                         | -423.9                         | -8.4                          |
| <b>1,5-OH</b>                | -375.5                         | -369.1                         | 6.4                           |
| <b>1,8-OH</b>                | -418.1                         | -396.4                         | 21.7                          |
| <b>1-NH<sub>2</sub></b>      | -814.4                         | -816.4                         | -2.0                          |
| <b>2-NH<sub>2</sub></b>      | -881.3                         | -875.9                         | 5.0                           |
| <b>1,2-NH<sub>2</sub></b>    | -967.0                         | -950.6                         | 25.4                          |
| <b>1,4-NH<sub>2</sub></b>    | -1000.1                        | -983.4                         | 16.6                          |
| <b>2,6-NH<sub>2</sub></b>    | -1051.4                        | -1086.0                        | -34.6                         |
| <b>1-OH-4-NH<sub>2</sub></b> | -698.9                         | -710.4                         | -11.5                         |

\*reference value

Table S5: Comparison of the electrochemical potential obtained for the second reduction step (AQ/AQ<sup>2-</sup>) at SCC DFTB/3ob/COSMO level against the experimental reference.

| Compound                     | $\Delta E_{calc}^{\circ}$ / mV | $\Delta E_{meas}^{\circ}$ / mV | $\Delta\Delta E^{\circ}$ / mV |
|------------------------------|--------------------------------|--------------------------------|-------------------------------|
| <b>AQ</b>                    | -1432.3*                       | -1432.3                        | 0.0                           |
| <b>1-OH</b>                  | -1175.2                        | -1178.5                        | -3.3                          |
| <b>2-OH</b>                  | -1484.5                        | -1139.8                        | <b>344.7</b>                  |
| <b>1,2-OH</b>                | -1212.9                        | -1125.5                        | 87.3                          |
| <b>1,4-OH</b>                | -1059.6                        | -1066.4                        | -6.8                          |
| <b>1,5-OH</b>                | -954.3                         | -893.5                         | 60.8                          |
| <b>1,8-OH</b>                | -1113.5                        | -1107.0                        | 6.54                          |
| <b>1-NH<sub>2</sub></b>      | -1544.3                        | -1516.9                        | 27.4                          |
| <b>1,2-NH<sub>2</sub></b>    | -1665.2                        | -1551.2                        | 114.0                         |
| <b>1,4-NH<sub>2</sub></b>    | -1631.6                        | -1541.8                        | 89.8                          |
| <b>2,6-NH<sub>2</sub></b>    | -1750.5                        | -1652.3                        | 98.2                          |
| <b>1-OH-4-NH<sub>2</sub></b> | -1330.9                        | -1328.9                        | 2.0                           |

\*reference value

Table S6: Comparison of the electrochemical potential obtained for the first reduction step (AQ/AQ<sup>•-</sup>) at SCC DFTB/mio/COSMO level against the experimental reference.

| <b>Compound</b>              | $\Delta E_{calc}^{\circ}$ / mV | $\Delta E_{meas}^{\circ}$ / mV | $\Delta\Delta E^{\circ}$ / mV |
|------------------------------|--------------------------------|--------------------------------|-------------------------------|
| <b>AQ*</b>                   | -683.6*                        | -683.6                         | 0.0                           |
| <b>1-OH</b>                  | -534.4                         | -530.0                         | 4.4                           |
| <b>2-OH</b>                  | -758.3                         | -707.5                         | 50.7                          |
| <b>1,2-OH</b>                | -617.2                         | -542.9                         | 74.3                          |
| <b>1,4-OH</b>                | -440.6                         | -423.9                         | 16.7                          |
| <b>1,5-OH</b>                | -417.7                         | -369.1                         | 48.6                          |
| <b>1,8-OH</b>                | -440.5                         | -396.4                         | 44.1                          |
| <b>1-NH<sub>2</sub></b>      | -922.9                         | -816.4                         | 106.5                         |
| <b>2-NH<sub>2</sub></b>      | -916.1                         | -875.9                         | 40.2                          |
| <b>1,2-NH<sub>2</sub></b>    | -1023.8                        | -950.6                         | 73.2                          |
| <b>1,4-NH<sub>2</sub></b>    | -997.7                         | -983.4                         | 14.3                          |
| <b>2,6-NH<sub>2</sub></b>    | -1212.0                        | -1086.0                        | 126.0                         |
| <b>1-OH-4-NH<sub>2</sub></b> | -699.48                        | -710.4                         | -10.9                         |

\*reference value

Table S7: Comparison of the electrochemical potential obtained for the second reduction step (AQ/AQ<sup>2-</sup>) at SCC DFTB/mio/COSMO level against the experimental reference.

| <b>Compound</b>              | $\Delta E_{calc}^{\circ}$ / mV | $\Delta E_{meas}^{\circ}$ / mV | $\Delta\Delta E^{\circ}$ / mV |
|------------------------------|--------------------------------|--------------------------------|-------------------------------|
| <b>AQ</b>                    | -1432.3*                       | -1432.3                        | 0.0                           |
| <b>1-OH</b>                  | -1152.3                        | -1178.5                        | -26.2                         |
| <b>2-OH</b>                  | -1586.8                        | -1139.8                        | <b>447.0</b>                  |
| <b>1,2-OH</b>                | -1188.9                        | -1125.5                        | -63.3                         |
| <b>1,4-OH</b>                | -1026.2                        | -1066.4                        | -40.2                         |
| <b>1,5-OH</b>                | -914.4                         | -893.5                         | 20.9                          |
| <b>1,8-OH</b>                | -1082.7                        | -1107.0                        | -24.3                         |
| <b>1-NH<sub>2</sub></b>      | -1511.7                        | -1516.9                        | -5.2                          |
| <b>1,2-NH<sub>2</sub></b>    | -1686.1                        | -1551.2                        | 134.9                         |
| <b>1,4-NH<sub>2</sub></b>    | -1634.1                        | -1541.8                        | 92.3                          |
| <b>2,6-NH<sub>2</sub></b>    | -1859.0                        | -1652.3                        | 206.7                         |
| <b>1-OH-4-NH<sub>2</sub></b> | -1289.8                        | -1328.9                        | -39.08                        |

\*reference value



Table S8: Comparison of the electrochemical potential obtained for the first reduction step (AQ/AQ $\bullet^-$ ) at GFN2-xTB/GBSA level against the experimental reference.

| <b>Compound</b>              | $\Delta E_{calc}^\circ / \text{mV}$ | $\Delta E_{meas}^\circ / \text{mV}$ | $\Delta\Delta E^\circ / \text{mV}$ |
|------------------------------|-------------------------------------|-------------------------------------|------------------------------------|
| <b>AQ*</b>                   | -683.6*                             | -683.6                              | 0.0                                |
| <b>1-OH</b>                  | -592.9                              | -530.0                              | 62.3                               |
| <b>2-OH</b>                  | -748.5                              | -707.5                              | 41.0                               |
| <b>1,2-OH</b>                | -653.3                              | -542.9                              | 110.4                              |
| <b>1,4-OH</b>                | -535.1                              | -423.9                              | 111.2                              |
| <b>1,5-OH</b>                | -509.1                              | -369.1                              | 140.0                              |
| <b>1,8-OH</b>                | -521.8                              | -396.4                              | 125.4                              |
| <b>1-NH<sub>2</sub></b>      | -918.1                              | -816.4                              | 101.7                              |
| <b>2-NH<sub>2</sub></b>      | -977.3                              | -875.9                              | 101.4                              |
| <b>1,2-NH<sub>2</sub></b>    | -1147.0                             | -950.6                              | 196.4                              |
| <b>1,4-NH<sub>2</sub></b>    | -1219.5                             | -983.4                              | 236.1                              |
| <b>2,6-NH<sub>2</sub></b>    | -1278.3                             | -1086.0                             | 192.3                              |
| <b>1-OH-4-NH<sub>2</sub></b> | -871.8                              | -710.4                              | 161.4                              |

\*reference value

Table S9: Comparison of the electrochemical potential obtained for the second reduction step (AQ/AQ<sup>2-</sup>) at GFN2-xTB/GBSA level against the experimental reference.

| Compound                     | $\Delta E_{calc}^{\circ}$ / mV | $\Delta E_{meas}^{\circ}$ / mV | $\Delta\Delta E^{\circ}$ / mV |
|------------------------------|--------------------------------|--------------------------------|-------------------------------|
| <b>AQ</b>                    | -1432.3*                       | -1432.3                        | 0.0                           |
| <b>1-OH</b>                  | -1204.8                        | -1178.5                        | 26.3                          |
| <b>2-OH</b>                  | -1476.4                        | -1139.8                        | <b>336.6</b>                  |
| <b>1,2-OH</b>                | -1213.4                        | -1125.5                        | 87.9                          |
| <b>1,4-OH</b>                | -1143.9                        | -1066.4                        | 77.5                          |
| <b>1,5-OH</b>                | -1124.6                        | -893.5                         | 231.1                         |
| <b>1,8-OH</b>                | -1175.4                        | -1107.0                        | 68.4                          |
| <b>1-NH<sub>2</sub></b>      | -1603.1                        | -1516.9                        | 86.2                          |
| <b>1,2-NH<sub>2</sub></b>    | -1761.3                        | -1551.2                        | 210.1                         |
| <b>1,4-NH<sub>2</sub></b>    | -1791.1                        | -1541.8                        | 249.3                         |
| <b>2,6-NH<sub>2</sub></b>    | -1880.5                        | -1652.3                        | 228.2                         |
| <b>1-OH-4-NH<sub>2</sub></b> | -1449.0                        | -1328.9                        | 120.1                         |

\*reference value

Table S10: Comparison of the electrochemical potential obtained for the first reduction step (AQ/AQ<sup>•-</sup>) at GFN2-xTB/ALPB level against the experimental reference.

| <b>Compound</b>              | $\Delta E_{calc}^{\circ}$ / mV | $\Delta E_{meas}^{\circ}$ / mV | $\Delta\Delta E^{\circ}$ / mV |
|------------------------------|--------------------------------|--------------------------------|-------------------------------|
| <b>AQ*</b>                   | -683.6*                        | -683.6                         | 0.0                           |
| <b>1-OH</b>                  | -548.7                         | -530.0                         | 18.7                          |
| <b>2-OH</b>                  | -739.0                         | -707.5                         | 31.5                          |
| <b>1,2-OH</b>                | -588.9                         | -542.9                         | 46.0                          |
| <b>1,4-OH</b>                | -467.6                         | -423.9                         | 43.7                          |
| <b>1,5-OH</b>                | -451.6                         | -369.1                         | 82.5                          |
| <b>1,8-OH</b>                | -478.6                         | -396.4                         | 82.2                          |
| <b>1-NH<sub>2</sub></b>      | -888.2                         | -816.4                         | 71.8                          |
| <b>2-NH<sub>2</sub></b>      | -1029.9                        | -875.9                         | 154.0                         |
| <b>1,2-NH<sub>2</sub></b>    | -1100.3                        | -950.6                         | 149.8                         |
| <b>1,4-NH<sub>2</sub></b>    | -1200.9                        | -983.4                         | 217.5                         |
| <b>2,6-NH<sub>2</sub></b>    | -1317.8                        | -1086.0                        | 231.8                         |
| <b>1-OH-4-NH<sub>2</sub></b> | -822.1                         | -710.4                         | 111.7                         |

\*reference value

Table S11: Comparison of the electrochemical potential obtained for the second reduction step (AQ/AQ<sup>2-</sup>) at GFN2-xTB/ALPB level against the experimental reference.

| <b>Compound</b>              | $\Delta E_{calc}^{\circ}$ / mV | $\Delta E_{meas}^{\circ}$ / mV | $\Delta\Delta E^{\circ}$ / mV |
|------------------------------|--------------------------------|--------------------------------|-------------------------------|
| <b>AQ</b>                    | -1432.3*                       | -1432.3                        | 0.0                           |
| <b>1-OH</b>                  | -1145.5                        | -1178.5                        | -33.0                         |
| <b>2-OH</b>                  | -1464.7                        | -1139.8                        | <b>324.9</b>                  |
| <b>1,2-OH</b>                | -1124.7                        | -1125.5                        | -0.8                          |
| <b>1,4-OH</b>                | -1035.9                        | -1066.4                        | -30.5                         |
| <b>1,5-OH</b>                | -944.0                         | -893.5                         | 50.5                          |
| <b>1,8-OH</b>                | -1076.7                        | -1107.0                        | -30.3                         |
| <b>1-NH<sub>2</sub></b>      | -1579.6                        | -1516.9                        | 62.7                          |
| <b>1,2-NH<sub>2</sub></b>    | -1747.6                        | -1551.2                        | 196.4                         |
| <b>1,4-NH<sub>2</sub></b>    | -1727.9                        | -1541.8                        | 186.1                         |
| <b>2,6-NH<sub>2</sub></b>    | -1891.4                        | -1652.3                        | 239.1                         |
| <b>1-OH-4-NH<sub>2</sub></b> | -1371.7                        | -1328.9                        | 42.8                          |

\*reference value

Table S12: Isodesmic reaction: Calculation of derivative reduction potentials using a reference reaction.

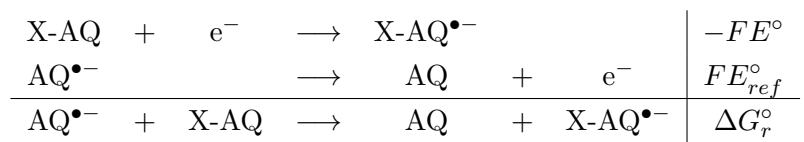

Table S13: Fit parameters of the linear regression applied to the experimentally determined electrochemical potentials plotted against the results obtained for the different theoretical calculation methods in vacuum.

|              |                | AQ / AQ <sup>•-</sup> | AQ / AQ <sup>2-</sup> |                   |
|--------------|----------------|-----------------------|-----------------------|-------------------|
|              |                | full                  | full                  | excluding 2-OH-AQ |
| B3LYP+D3     | a              | 0.84 ± 0.02           | 0.78 ± 0.12           | 0.86 ± 0.03       |
|              | b / mV         | -145 ± 16             | -320 ± 150            | -250 ± 34         |
|              | R <sup>2</sup> | 0.992                 | 0.826                 | 0.992             |
| SCC DFTB/3ob | a              | 0.78 ± 0.04           | 0.62 ± 0.10           | 0.69 ± 0.04       |
|              | b / mV         | -198 ± 29             | -536 ± 124            | -486 ± 44         |
|              | R <sup>2</sup> | 0.974                 | 0.812                 | 0.979             |
| SCC DFTB/mio | a              | 0.76 ± 0.03           | 0.60 ± 0.10           | 0.66 ± 0.04       |
|              | b / mV         | -179 ± 19             | -537 ± 171            | -495 ± 48         |
|              | R <sup>2</sup> | 0.989                 | 0.818                 | 0.974             |
| GFN2-xTB     | a              | 0.77 ± 0.02           | 0.69 ± 0.09           | 0.73 ± 0.03       |
|              | b / mV         | -156 ± 13             | -426 ± 113            | -403 ± 38         |
|              | R <sup>2</sup> | 0.995                 | 0.873                 | 0.987             |

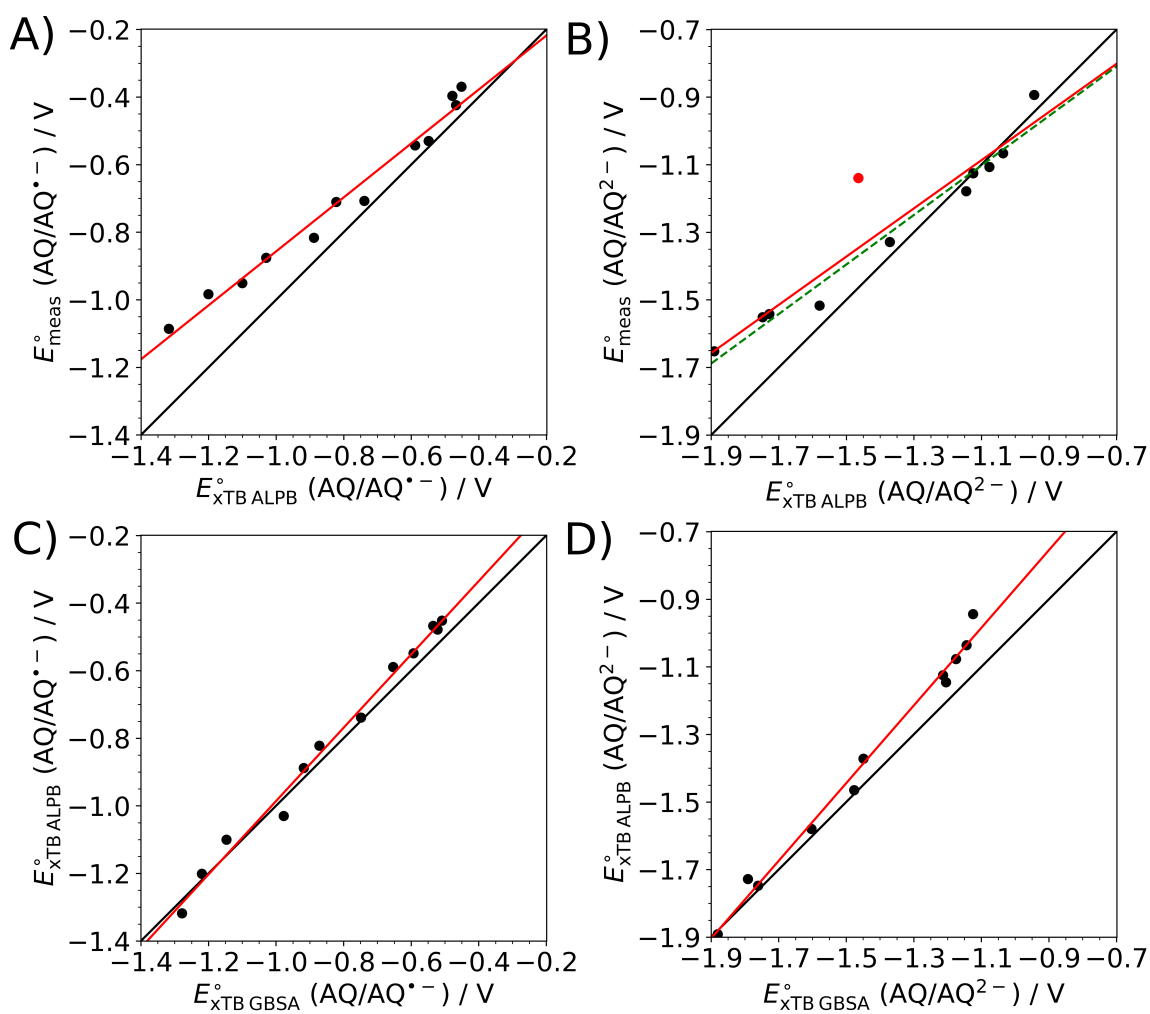

Figure S1: Correlation between the electrochemical potentials for the first (left) and second (right) reduction step of different AQ-derivatives between A,B) the experimental reference and the GFN2-xTB/ALPB level as well as C,D) the GFN2-xTB/ALPB and GFN2-xTB/GBSA levels, respectively. Black line: ideal correlation. Red line: linear regression. Green dashed line: linear regression without the outlier 2-OH-AQ marked by a red dot.

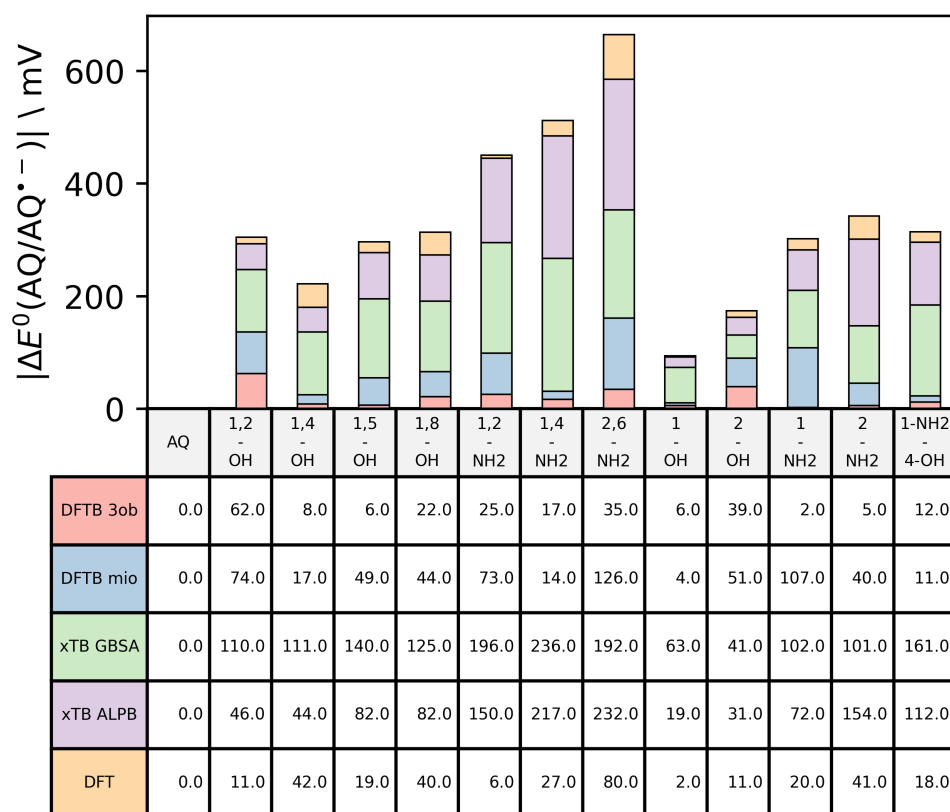

Figure S2: Comparison of the absolute deviation between the employed computational methods from the experimental reference for the first reduction step ( $AQ/AQ^{\bullet-}$ ).



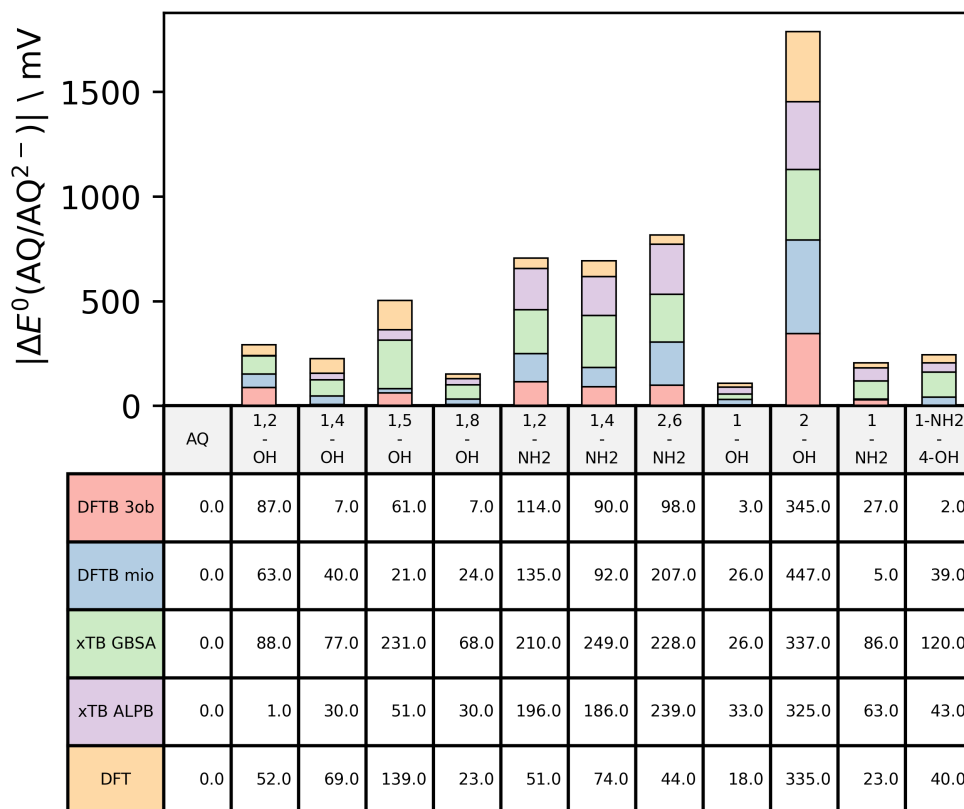

Figure S3: Comparison of the absolute deviation between the employed computational methods from the experimental reference for the first reduction step ( $AQ/AQ^{2-}$ ).

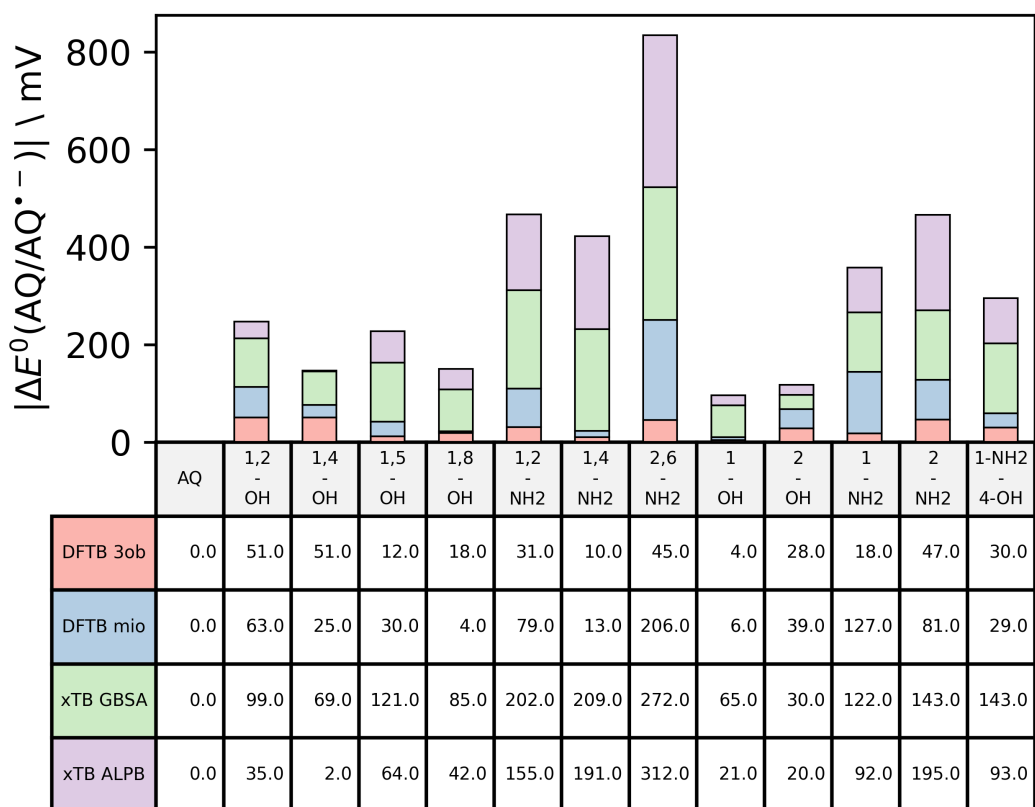

Figure S4: Comparison of the absolute deviation between the employed DFTB and xTB methods from the B3LYP+D3 reference for the first reduction step ( $AQ/AQ^{\bullet-}$ ).

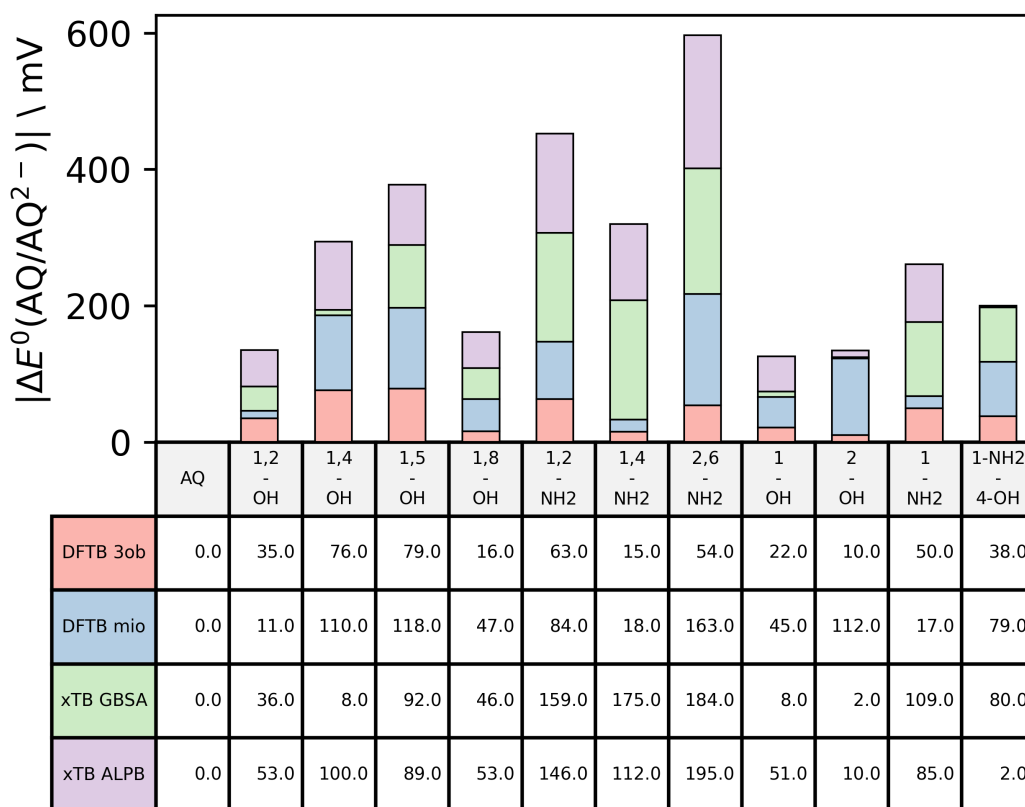

Figure S5: Comparison of the absolute deviation between the employed DFTB and xTB methods from the B3LYP+D3 reference for the second reduction step (AQ/AQ<sup>2-</sup>).

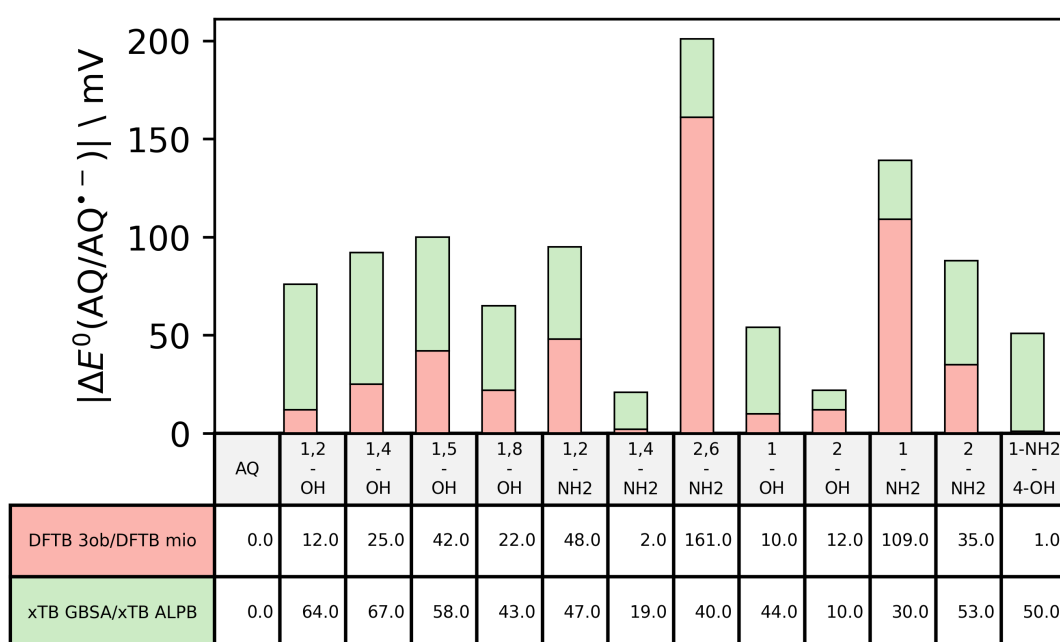

Figure S6: Comparison of the absolute deviation between the SCC DFTB/3ob and SCC DFTB/mio levels as well as between GFN2-xTB/ALPB and GFN2-xTB/GBSA for the first reduction step (AQ/AQ<sup>•-</sup>) of the different AQ derivatives.

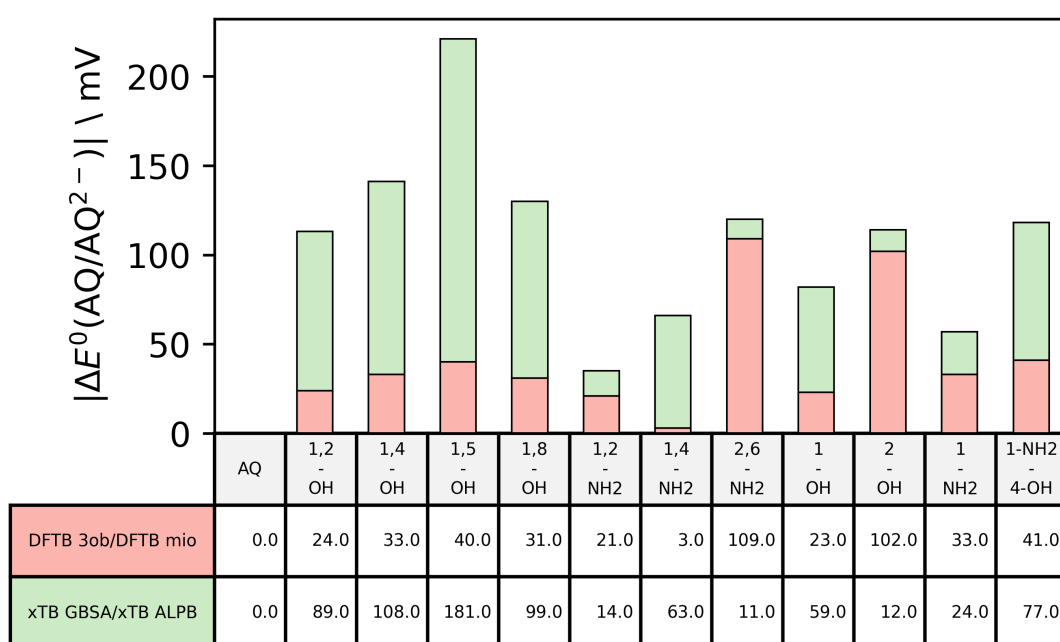

Figure S7: Comparison of the absolute deviation between the SCC DFTB/3ob and SCC DFTB/mio levels as well as between GFN2-xTB/ALPB and GFN2-xTB/GBSA for the second reduction step (AQ/AQ<sup>2-</sup>) of the different AQ derivatives.

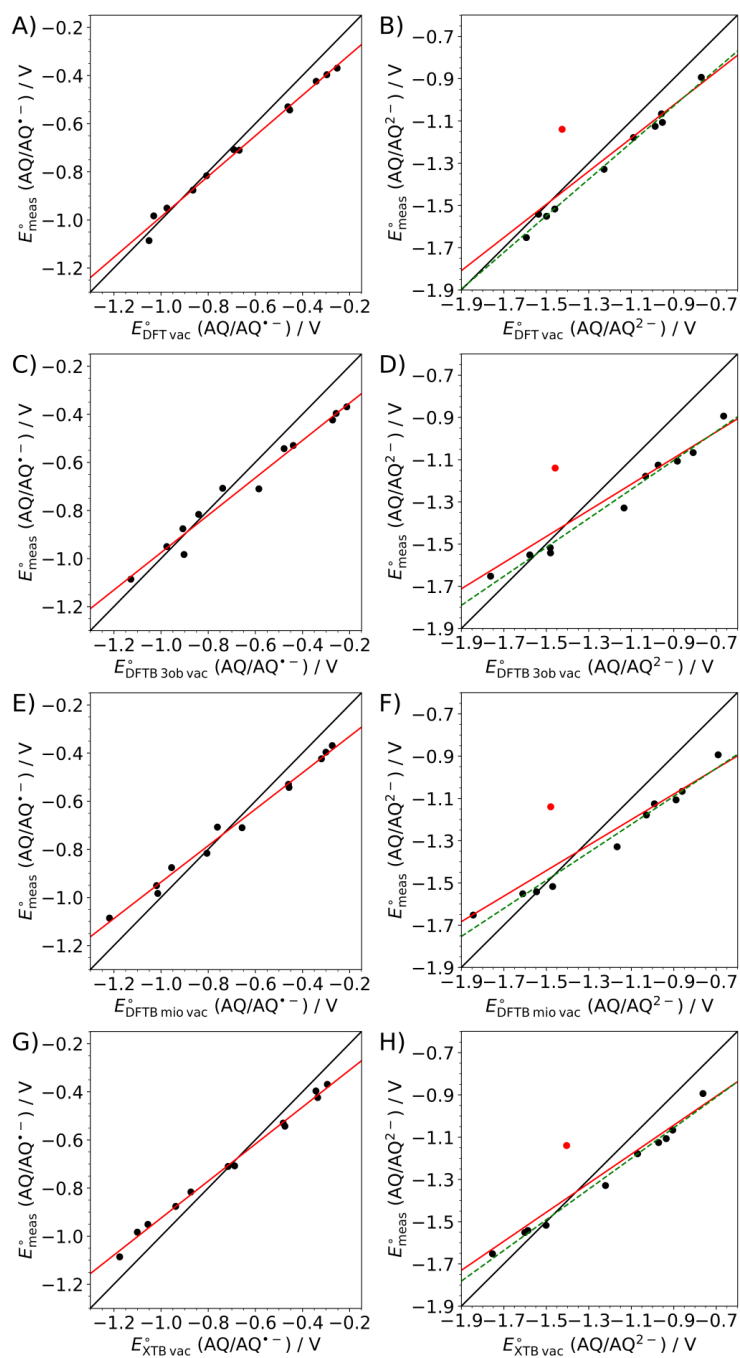

Figure S8: Correlation between the experimentally and theoretically determined electrochemical potentials for the first (left) and second (right) reduction step of the considered AQ-derivatives obtained at A,B) B3LYP+D3/6-31++G(d,p), C,D) SCC DFTB/3ob, E,F) SCC DFTB/mio and G,H) GFN2-xTB level in vacuum. Black line: ideal correlation. Red line: linear regression. Green dashed line: linear regression without the outlier 2-OH-AQ marked by a red dot.

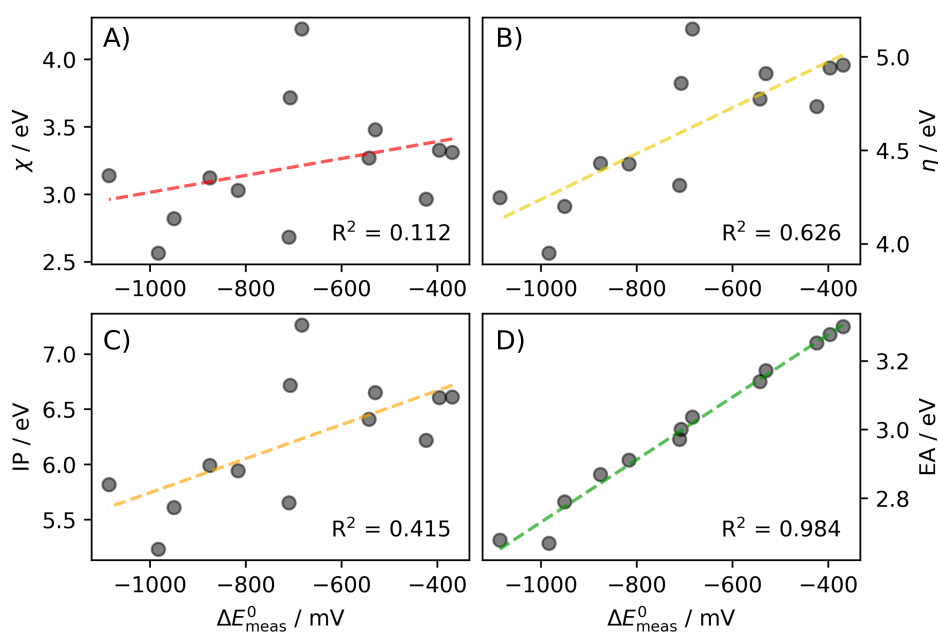

Figure S9: Correlation between the experimentally measured first reduction potential and A) the electronegativity  $\chi$ , B) hardness  $\eta$ , C) ionisation potential IP, D) electron affinity EA, calculated with B3LYP+D3/6-31++G(d,p).

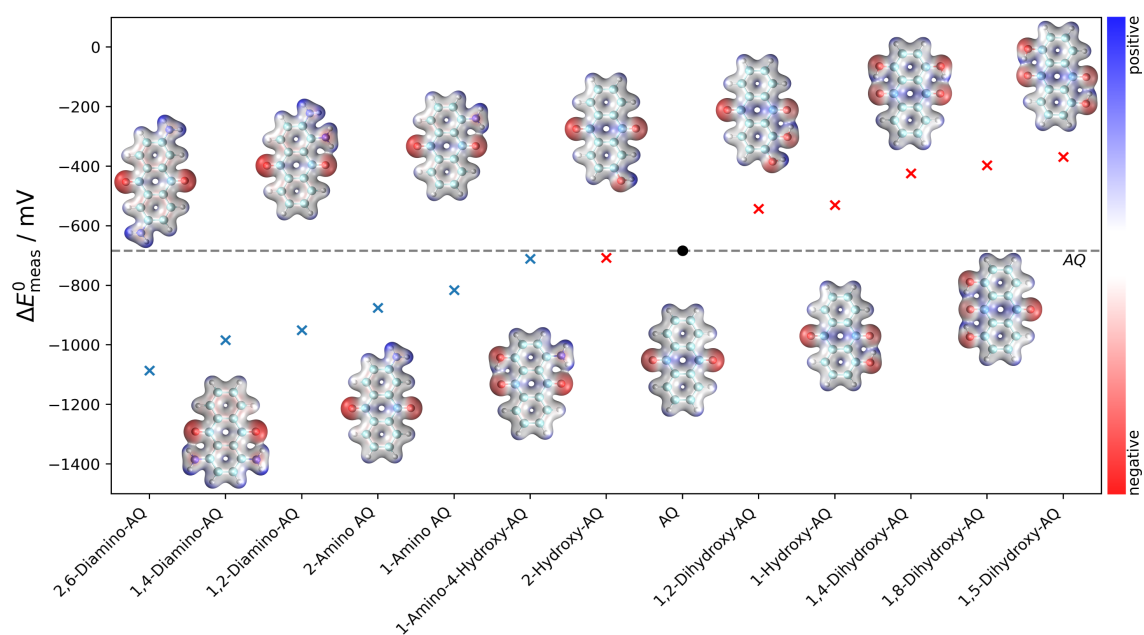

Figure S10: Representation of the experimentally measured first reduction potential with electrostatic potential projected on an isodensity of the associated electron density (isovalue = 0.025) calculated with B3LYP+D3/6-31++G(d,p).
